# Supplementary material for: Rapid and high-capacity adsorption of sulfonated anionic dyes onto basic bismuth(iii) nitrate via bidentate bridging and electrostatic attracting interactions
Source: Royal Society of Chemistry journal article supplement (doi:10.1039/c6ra03055f), 2016-01-01
Supplement: c6ra03055f1.pdf [file c6ra03055f1.pdf]

## Electronic Supplementary Information (ESI)

for

### **Rapid and high-capacity adsorption of sulfonated anionic dyes onto a basic bismuth(III) nitrate via bidentate bridging and electrostatic attracting interactions**

Jiayang Xiao, Hui Zhang, Yue Xia, Zelin Li, Wei Huang\*

*Key Laboratory of Chemical Biology and Traditional Chinese Medicine Research (Ministry of Education of China), National & Local Joint Engineering Laboratory for New Petro-chemical Materials and Fine Utilization of Resources, Key Laboratory of the Assembly and Application of Organic Functional Molecules, Hunan Normal University, Changsha 410081, China*

\* Corresponding author.

E-mail address: [hjhw9513@163.com](mailto:hjhw9513@163.com) (W. Huang)

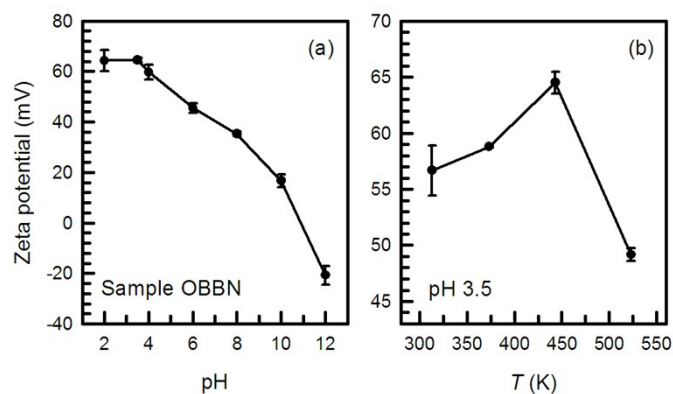

**Fig. S1** (a) Effect of solution pH and heat treatment temperature on zeta potential of basic bismuth (III) nitrate samples.

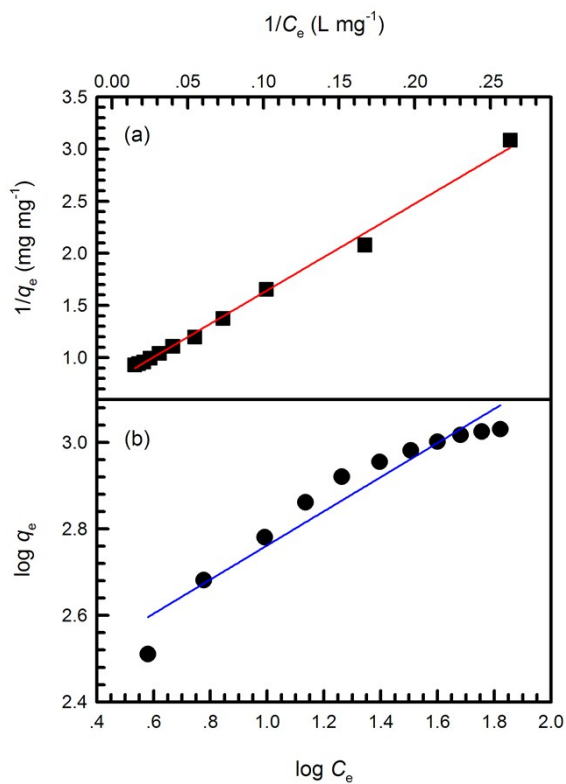

**Fig. S2** (a) Langmuir and (b) Freundlich adsorption isotherm for MO adsorption on OBBN adsorbent at 303 K.

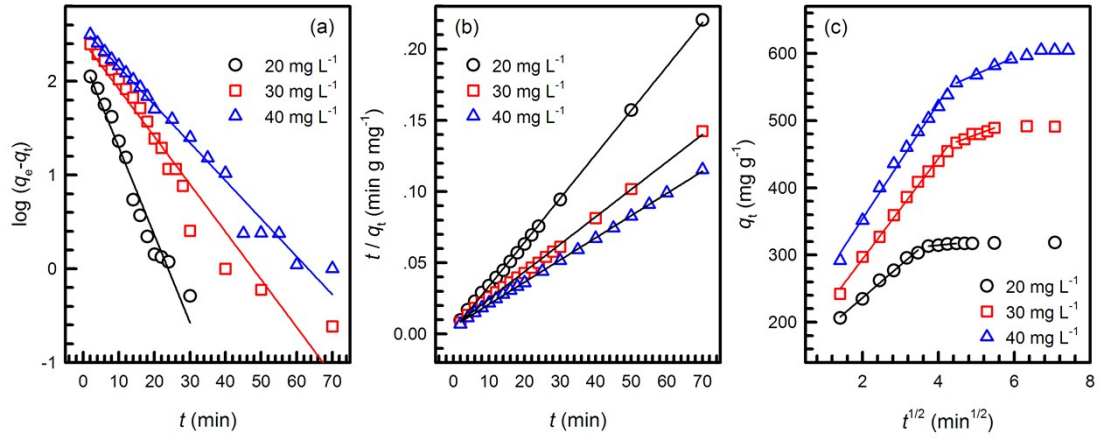

**Fig. S3** (a) Pseudo- first -order kinetic, (b) Pseudo-second-order kinetic and (c) Weber–Morris intraparticle diffusion plots for MO adsorption on OBBN adsorbent at 303 K.

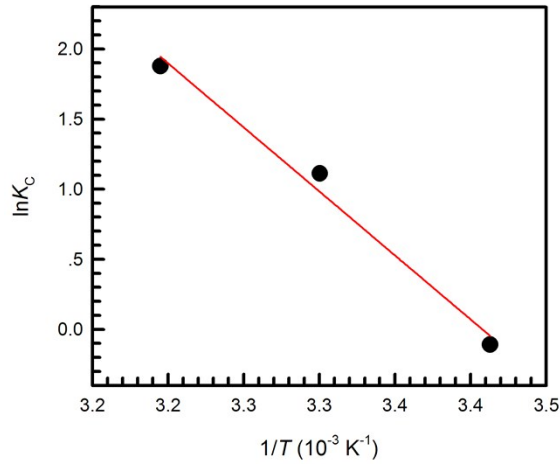

**Fig. S4** Plot of  $\ln K_C$  versus  $1/T$  for estimation of thermodynamic parameters for MO adsorption on OBBN adsorbent ( $C_0 = 40 \text{ mg L}^{-1}$ ).

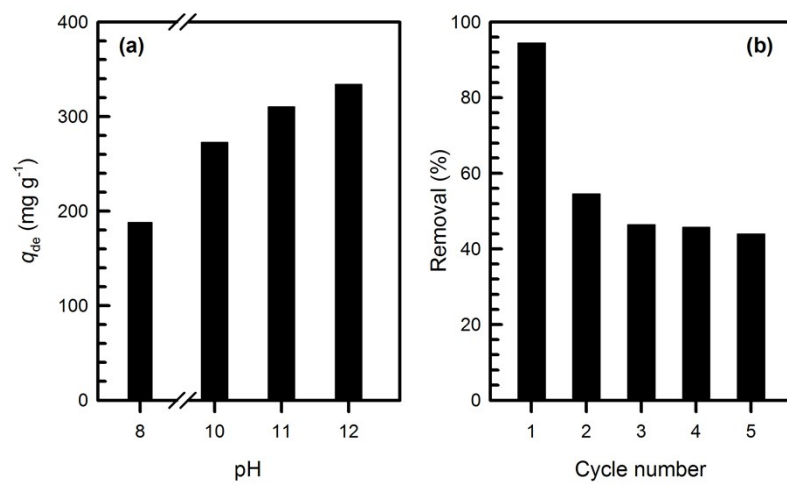

**Fig. S5** (a) Effect of solution pH for MO desorption from OBBN and (b) variation of the MO removal percentage on OBBN adsorbent as a function of regeneration cycles.

**Table S1** Isotherm parameters for MO adsorption on OBBN adsorbent. ( $T = 303\text{ K}$ ,  $m = 10\text{ mg}$ )

| Langmuir model              |                             |        |        | Freundlich model |       |        |
|-----------------------------|-----------------------------|--------|--------|------------------|-------|--------|
| $q_m$ (mg g <sup>-1</sup> ) | $K_L$ (L mg <sup>-1</sup> ) | $R^2$  | $R_L$  | $K_F$            | $n$   | $R^2$  |
| 1298                        | 0.0903                      | 0.9950 | 0.0845 | 232.8            | 2.532 | 0.9313 |

**Table S2** Adsorption kinetic parameters for MO adsorption on OBBN at different initial concentrations. ( $T = 303\text{ K}$ ,  $m = 10\text{ mg}$ )

| $C_0$<br>(mg L <sup>-1</sup> ) | $q_{e,\text{exp}}$<br>(mg/g) | Pseudo-first order          |                            |        | Pseudo-second order         |                                                |        |                                             |
|--------------------------------|------------------------------|-----------------------------|----------------------------|--------|-----------------------------|------------------------------------------------|--------|---------------------------------------------|
|                                |                              | $q_e$ (mg g <sup>-1</sup> ) | $k_1$ (min <sup>-1</sup> ) | $R^2$  | $q_e$ (mg g <sup>-1</sup> ) | $k_2$ (mg mg <sup>-1</sup> min <sup>-1</sup> ) | $R^2$  | $h$ (mg g <sup>-1</sup> min <sup>-1</sup> ) |
| 20                             | 327.8                        | 169.8                       | 0.225                      | 0.9638 | 322.6                       | 3.559                                          | 0.9995 | 370.37                                      |
| 30                             | 501.3                        | 266.7                       | 0.117                      | 0.9431 | 526.3                       | 0.694                                          | 0.9986 | 192.31                                      |
| 40                             | 613.6                        | 362.2                       | 0.093                      | 0.9801 | 625.0                       | 0.483                                          | 0.9995 | 188.70                                      |

**Table S3** Intraparticle diffusion model parameters of MO adsorption on OBBN adsorbent. ( $T = 303\text{ K}$ ,  $m = 10\text{ mg}$ )

| $C_0$<br>(mg L <sup>-1</sup> ) | $k_{i,1}$<br>(mg g <sup>-1</sup> min <sup>-1/2</sup> ) | $C_1$<br>(mg g <sup>-1</sup> ) | $R^2$  | $k_{i,2}$<br>(mg g <sup>-1</sup> min <sup>-1/2</sup> ) | $C_2$ | $R^2$<br>(mg g <sup>-1</sup> ) |
|--------------------------------|--------------------------------------------------------|--------------------------------|--------|--------------------------------------------------------|-------|--------------------------------|
| 20                             | 48.52                                                  | 139.2                          | 0.9933 | 5.59                                                   | 292.2 | 0.9815                         |
| 30                             | 74.86                                                  | 144.0                          | 0.9947 | 20.76                                                  | 375.3 | 0.9593                         |
| 40                             | 86.12                                                  | 181.5                          | 0.9914 | 24.98                                                  | 444.0 | 0.9952                         |
